# Supplementary material for: Functional Variation in the FAAH Gene Is Directly Associated with Subjective Well-Being and Indirectly Associated with Problematic Alcohol Use
Source: MDPI journal article supplement (doi:10.3390/genes14091826), 2023-09-21
Supplement: s1 [file s1]

## Supplementary material

**Table S1. Phenome-Wide Association Study (PheWAS) identified 66 traits significantly linked to *FAAH*'s rs324420 at  $p < 0.01$ . Within the psychiatric domain, the PheWAS unveiled three significant traits (highlighted in yellow).**

| Domain           | Trait                                                                                                  | P-value     | N      | EA |
|------------------|--------------------------------------------------------------------------------------------------------|-------------|--------|----|
| Activities       | Number of days/week of vigorous physical activity 10+ minutes                                          | 0.003794    | 368164 | C  |
| Activities       | Time spent driving                                                                                     | 0.005381    | 258336 | A  |
| Activities       | Types of physical activity in last 4 weeks: Other exercises (eg: swimming, cycling, keep fit, bowling) | 0.001304    | 384450 | C  |
| Activities       | Positive affect (univariate)                                                                           | 0.009076533 | 410603 | A  |
| Activities       | Strenuous sports or other exercises                                                                    | 0.0047      | 350492 | C  |
| Activities       | Vigorous physical activity                                                                             | 0.0066      | 261055 | C  |
| Activities       | Moderate to vigorous physical activity levels                                                          | 0.00074     | 377234 | C  |
| Cardiovascular   | Heart rate                                                                                             | 0.002564    | 85787  | A  |
| Cardiovascular   | Pulse rate (automated reading)                                                                         | 0.0006695   | 361411 | A  |
| Cardiovascular   | Heart rate recovery at 40 secnds                                                                       | 0.0069      | 58818  | C  |
| Cardiovascular   | Posterior wall thickness                                                                               | 0.009263    | 19373  | A  |
| Cardiovascular   | Left ventricular mass                                                                                  | 0.003373    | 19076  | A  |
| Cardiovascular   | Resting heart rate                                                                                     | 0.0000085   | 458969 | A  |
| Dermatological   | Male-specific factors - Hair/balding pattern: Pattern 1                                                | 0.001682    | 176380 | C  |
| Dermatological   | Male pattern baldness (BOLT LMM infinitesimal mixed model)                                             | 0.0072      | 205327 | A  |
| Dermatological   | Male pattern baldness (BOLT LMM non-infinitesimal mixed model)                                         | 0.0087      | 205327 | A  |
| Environment      | Illnesses of mother: Breast cancer                                                                     | 0.006447    | 367939 | C  |
| Gastrointestinal | Ulcerative colitis                                                                                     | 0.005761    | 45975  | A  |
| Gastrointestinal | Non-cancer illness code, self-reported: gastro-oesophageal reflux (gord) / gastric reflux              | 0.002621    | 289307 | A  |
| Immunological    | CD123 on 11c+123+DC                                                                                    | 0.004897054 | 669    | A  |
| Metabolic        | Amino acid::Glycine, serine and threonine metabolism::threonine                                        | 0.009639    | 6020   | A  |
| Metabolic        | Amino acid::Histidine metabolism::histidine                                                            | 0.00237     | 7804   | A  |
| Metabolic        | Lipid::Bile acid metabolism::glycochenodeoxycholate                                                    | 0.003626    | 7087   | A  |
| Metabolic        | Lipid::Carnitine metabolism::carnitine                                                                 | 0.009458    | 7797   | A  |
| Metabolic        | Lipid::Essential fatty acid::docosahexaenoate (DHA; 22:6n3)                                            | 0.001206    | 7818   | C  |
| Metabolic        | Lipid::Essential fatty acid::linolenate [alpha or gamma; (18:3n3 or 6)]                                | 0.006324    | 7786   | C  |

|              |                                                                             |             |        |   |
|--------------|-----------------------------------------------------------------------------|-------------|--------|---|
| Metabolic    | Lipid::Fatty acid metabolism (also BCAA metabolism)::propionylcarnitine     | 0.002213    | 7813   | A |
| Metabolic    | Lipid::Long chain fatty acid::stearidonate (18:4n3)                         | 0.001075    | 7775   | C |
| Metabolic    | Lipid::Lysolipid::1-arachidonoylglycerophosphoethanolamine*                 | 0.00762     | 7798   | A |
| Metabolic    | Lipid::Lysolipid::1-heptadecanoylglycerophosphocholine                      | 0.006804    | 7422   | C |
| Metabolic    | Peptide::gamma-glutamyl::gamma-glutamylvaline                               | 0.0009626   | 7753   | A |
| Metabolic    | :::X-06126                                                                  | 0.005869    | 7785   | A |
| Metabolic    | :::X-11261                                                                  | 0.004773    | 7771   | C |
| Metabolic    | :::X-11374                                                                  | 0.001753    | 2609   | A |
| Metabolic    | :::X-11478                                                                  | 0.008187    | 6593   | C |
| Metabolic    | :::X-11529                                                                  | 0.005358    | 6664   | A |
| Metabolic    | :::X-11792                                                                  | 0.002144    | 2442   | C |
| Metabolic    | Peptide::Dipeptide::X-12244--N-acetylcarnosine                              | 0.001479    | 6608   | C |
| Metabolic    | :::X-12556                                                                  | 0.006334    | 7483   | A |
| Metabolic    | :::X-12729                                                                  | 0.006026    | 1753   | C |
| Metabolic    | 22:6, docosahexaenoic acid (DHA)                                            | 0.008215    | 13499  | C |
| Metabolic    | OmegaL3 fatty acids                                                         | 0.001872    | 13544  | C |
| Metabolic    | Adiponectin                                                                 | 0.004142    | 7825   | C |
| Metabolic    | 25-Hydroxyvitamin D level                                                   | 0.008131    | 79366  | C |
| Neurological | Inferior fronto-occipital fasciculus fractional anisotropy                  | 0.001681    | 17706  | A |
| Neurological | Splenium of corpus callosum fractional anisotropy                           | 0.008783    | 17706  | A |
| Neurological | External capsule mean diisivities                                           | 0.009321    | 17706  | C |
| Neurological | Inferior fronto-occipital fasciculus mean diisivities                       | 0.001051    | 17706  | C |
| Neurological | External capsule radial diisivities                                         | 0.009843    | 17706  | C |
| Neurological | Inferior fronto-occipital fasciculus radial diisivities                     | 0.0001234   | 17706  | C |
| Nutritional  | Lamb/mutton intake                                                          | 0.009147    | 384188 | A |
| Nutritional  | Bread intake                                                                | 0.002949    | 377627 | A |
| Nutritional  | Never eat eggs, dairy, wheat, sugar: Sugar or foods/drinks containing sugar | 0.002323    | 384986 | C |
| Nutritional  | Never eat eggs, dairy, wheat, sugar: I eat all of the above                 | 0.001757    | 384986 | A |
| Psychiatric  | Alcohol dependence                                                          | 0.0050206   | 1161   | A |
| Psychiatric  | Nap during day                                                              | 0.00006174  | 386124 | A |
| Psychiatric  | Happiness and subjective well-being - General happiness                     | 0.008221    | 126132 | C |
| Reproduction | Had menopause (female)                                                      | 0.009168    | 175519 | A |
| Reproduction | Dysmenorrhea pain severity                                                  | 0.006661616 | 11348  | C |

|                     |                                                                             |             |        |    |
|---------------------|-----------------------------------------------------------------------------|-------------|--------|----|
| Reproduction        | Menstruation quality of life impact: Increased appetite                     | 0.004765989 | 11348  | C  |
| Skeletal            | Total-body less head BMD                                                    | 0.00412804  | 10414  | A  |
| Skeletal            | Total-body lean mass                                                        | 0.0092822   | 10414  | A  |
| Skeletal            | Total-body less head BMD and total body lean mass (bivariate meta-analysis) | 0.00515213  | 10414  | NA |
| Skeletal            | Osteoarthritis of hip or knee (hospital diagnosed)                          | 0.00577852  | 32970  | C  |
| Skeletal            | Heel bone mineral density                                                   | 0.0056      | 394929 | C  |
| Social Interactions | Number of full brothers                                                     | 0.00537     | 380062 | A  |

**Table S2. Linear regression of alcohol use on *FAAH* genotype<sup>‡</sup>**

| <b>PART Wave</b> | <b>AUDIT scale</b> | <b>N</b> | <b>B (95% CI)<sup>a</sup></b> | <b>P</b> | <b>B (95% CI)<sup>b</sup></b> | <b>P</b> |
|------------------|--------------------|----------|-------------------------------|----------|-------------------------------|----------|
| Wave I           | AUDIT-10           | 2,647    | 0.02 (-0.16, 0.21)            | 0.78     | 0.07 (-0.11, 0.25)            | 0.45     |
|                  | AUDIT-P            | 2,653    | 0.04 (-0.06, 0.16)            | 0.42     | 0.05 (-0.05, 0.17)            | 0.30     |
| Wave II          | AUDIT-10           | 2,644    | -0.07 (-0.26, 0.11)           | 0.45     | -0.03 (-0.21, 0.15)           | 0.72     |
|                  | AUDIT-P            | 2,651    | 0.02 (-0.08, 0.14)            | 0.64     | 0.04 (-0.07, 0.15)            | 0.48     |

<sup>‡</sup> rs324420: CC (coded 0), AC (coded 1), AA (coded 2)

<sup>a</sup> Crude regression

<sup>b</sup> Adjusted for age and sex
